CORRECTION

# Correction: A Statistical Model for Estimation of Fish Density Including Correlation in Size, Space, Time and between Species from Research Survey Data

J. Rasmus Nielsen, Kasper Kristensen, Peter Lewy, Francois Bastardie

The following information is missing from the Acknowledgements section: The research leading to these results has partly received funding from the EU-FP7-SOCIOEC project under grant agreement No. 289192.

## Reference

1. Nielsen JR, Kristensen K, Lewy P, Bastardie F (2014) A Statistical Model for Estimation of Fish Density Including Correlation in Size, Space, Time and between Species from Research Survey Data. PLoS ONE 9(6): e99151. doi: [10.1371/journal.pone.0099151](https://doi.org/10.1371/journal.pone.0099151) PMID: [24911631](https://pubmed.ncbi.nlm.nih.gov/24911631/)

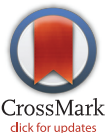

## OPEN ACCESS

**Citation:** Nielsen JR, Kristensen K, Lewy P, Bastardie F (2016) Correction: A Statistical Model for Estimation of Fish Density Including Correlation in Size, Space, Time and between Species from Research Survey Data. PLoS ONE 11(2): e0148722. doi:10.1371/journal.pone.0148722

**Published:** February 3, 2016

**Copyright:** © 2016 Nielsen et al. This is an open access article distributed under the terms of the [Creative Commons Attribution License](https://creativecommons.org/licenses/by/4.0/), which permits unrestricted use, distribution, and reproduction in any medium, provided the original author and source are credited.
